# Supplementary material
Source: PubMed Central journal article supplement (PMC3780861)
Supplement: 1312012110_pnas.201312012SI.pdf [file 1312012110_pnas.201312012SI.pdf]

# Supporting Information

Narita et al. 10.1073/pnas.1312012110

## SI Materials and Methods

**Bacterial Strains.** SN1145 was constructed by removing the kanamycin-resistance cassette from GC187 by using pCP20. Gene disruption of AD16, MC4100, and SN1145 was conducted by transferring the kanamycin-resistance cassette from a corresponding strain of the Keio collection by P1-mediated transduction (1). Multiple-gene disruptants were constructed by successive transduction combined with removal of the kanamycin-resistance cassette by using pCP20 as described previously (2). SN147, SN150, and SN909 were constructed by transducing the  $\Delta$ bamB::tet allele from SM4106 to AD16, SN56, and SN896, respectively, by P1 transduction. All gene disruptions were verified by PCR with appropriate primers.

**Plasmids.** For construction of pCA24N $\Delta$ Not, which was used as an empty vector control for ASKA plasmids, a NotI fragment was deleted from pCA24N (3) by digestion with NotI followed by self-ligation. pUC-bepA-his<sub>6</sub> was constructed as follows. A DNA fragment encoding BepA<sub>His6</sub> was amplified by PCR from the genomic DNA of *Escherichia coli* BW25113 (4) using a pair of primers, yfgC-1 and yfgC-2 (Table S4). The amplified DNA fragment was digested with EcoRI and KpnI and then cloned into the same sites of pUC18. pTTQ-bepA-his<sub>6</sub> was constructed essentially as described for pUC-bepA-his<sub>6</sub> except that the DNA fragment was amplified with yfgC-3 instead of yfgC-1 and cloned into pTTQ18. pUC-bepA-his<sub>10</sub> was constructed by self-ligation of a DNA fragment that was PCR-amplified from pUC-bepA-his<sub>6</sub> using a pair of primers, yfgC-his10-1 and yfgC-his10-2, after treatment with T4 polynucleotide kinase (TaKaRa Bio). pTH-bepA-his<sub>10</sub> was constructed by subcloning the EcoRI-SalI fragment derived from pUC-bepA-his<sub>10</sub> into the same sites of pTH18cr. For construction of pCDF-bepA-his<sub>10</sub>, a DNA fragment was PCR-amplified from pUC-bepA-his<sub>10</sub> using a pair of primers, yfgC-4 and M4C, digested with NcoI and SalI, and cloned into the same sites of pCDFDuet-1. For construction of pUC-bepA, a DNA fragment was PCR-amplified from pTH-bepA-his<sub>10</sub> using a pair of primers, yfgC-1 and yfgC-Pst-2, and cloned into the EcoRI-SmaI site of pUC18 after digestion with EcoRI. Plasmids encoding the H136R mutant form of BepA were constructed by site-directed mutagenesis using a pair of complementary primers, yfgC\_H136R and yfgC\_H136R-r. Plasmids encoding the E137Q mutant form of BepA were constructed in the same way using primers yfgC\_E137X and yfgC\_E137X-r. pUC-bepA(Q428Amber) was also constructed in the same way using primers TPR4-2 and TPR4-2-r. pMAN-lptE was constructed as follows. The *lptE* coding region was PCR-amplified from the genomic DNA of BW25113 using a pair of primers, lptE-1 and lptE-2. The amplified DNA fragment was digested with EcoRI and HindIII and then cloned into the same sites of pMAN885EH. To construct pMAN-lptD-his<sub>6</sub>, a DNA fragment encoding LptD<sub>His6</sub> was amplified by PCR from the genomic DNA of BW25113 using a pair of primers, lptD-1 and lptD-2, digested with XbaI, and cloned into the SmaI-XbaI site of pMAN885EH. pMAN-lptD-his<sub>6</sub> derivatives encoding LptD<sub>His6</sub> with Cys to Ser substitutions were constructed by site-directed mutagenesis. To construct pMAN-bamB-his<sub>6</sub>, a DNA fragment encoding BamB<sub>His6</sub> was amplified by PCR from the genomic DNA of DH5 $\alpha$  using a pair of primers, yfgL-1 and yfgL-2, digested with EcoRI and HindIII, and cloned into the same sites of pMAN885EH.

**Purification of BepA and in Vitro Proteolytic Activity Assay.** KRX cells were transformed with pCDF-bepA-his<sub>10</sub> or pCDF-bepA(E137Q)-his<sub>10</sub> encoding His<sub>10</sub>-tagged wild-type BepA or BepA(E137Q) and grown in L medium supplemented with 0.1% rhamnose at 37 °C. When the culture OD (at 600 nm) reached 1.0, cells were harvested by centrifugation at 5,000  $\times$  g for 10 min and then resuspended in 20 mM Tris-HCl (pH 7.5) containing 1  $\mu$ g/mL DNase I. Cells were disrupted by a single passage through a French Press cell at 10,000 psi. After removal of unbroken cells by centrifugation at 10,000  $\times$  g for 5 min, membranes were removed by centrifugation at 100,000  $\times$  g for 1 h. The supernatant was applied to TALON metal affinity resin (Clontech), and the column was successively washed with buffer A [20 mM Tris-HCl (pH 7.5), 50 mM NaCl] supplemented with 0, 5, or 20 mM imidazole, and finally eluted with buffer A containing 50 mM imidazole.

For protease activity assay, a purified preparation of BepA<sub>His10</sub> or BepA(E137Q)<sub>His10</sub> (200  $\mu$ g/mL) was mixed with  $\alpha$ -casein (400  $\mu$ g/mL; Sigma) and incubated at 37 °C in buffer containing 20 mM Tris-HCl (pH 7.5), 0.05% *n*-dodecyl- $\beta$ -D-maltopyranoside (DDM), and 10  $\mu$ M ZnCl<sub>2</sub>. Where specified, 1,10-phenanthroline or EDTA instead of ZnCl<sub>2</sub> was added at 250  $\mu$ M. Samples were mixed with a quarter volume of 5 $\times$  SDS sample buffer, boiled for 5 min, and subjected to SDS/PAGE. Proteins were visualized by staining with Coomassie brilliant blue R-250 (CBB).

**Pull-Down Assay.** Cells of AD16 transformed with pMAN885EH and pUC-bepA(E137Q), and SN147 transformed with pMAN-bamB-his<sub>6</sub> and pUC-bepA(E137Q), were grown in L medium supplemented with 0.01% arabinose and 0.1 mM IPTG at 30 °C. When the culture OD reached 1.0, cells were harvested by centrifugation at 5,000  $\times$  g for 10 min, and resuspended in 20 mM Tris-HCl (pH 7.5) containing 1  $\mu$ g/mL DNase I. Cells were disrupted by a single passage through a French Press cell at 10,000 psi. After removal of unbroken cells by centrifugation at 10,000  $\times$  g for 5 min, the membrane fraction was recovered by centrifugation at 100,000  $\times$  g for 1 h. The membranes were resuspended in 20 mM Tris-HCl (pH 7.5) containing 300 mM NaCl and 2% (wt/vol) DDM, and incubated at 4 °C for 30 min for solubilization. After removal of insoluble materials by centrifugation at 100,000  $\times$  g for 30 min, the supernatant was diluted 10-fold with 20 mM Tris-HCl (pH 7.5) containing 300 mM NaCl and applied to Dynabeads His-tag Isolation and Pulldown (Invitrogen). The beads were successively washed with buffer B [20 mM Tris-HCl (pH 7.5), 300 mM NaCl, 0.05% DDM], supplemented with 0, 5, 20, or 50 mM imidazole, and eluted with buffer B containing 250 mM imidazole.

**Mass Spectrometry.** The membrane fraction of bis(sulfosuccinimidyl) suberate-treated spheroplasts of MC4100 transformed with pTTQ-bepA(E137Q)-his<sub>6</sub> was prepared as described above and solubilized in 50 mM Tris-HCl (pH 7.5) containing 0.5% SDS at 37 °C for 5 min. After 10-fold dilution with 20 mM Tris-HCl (pH 7.5) containing 2% (wt/vol) Triton X-100, insoluble materials were removed by ultracentrifugation at 100,000  $\times$  g for 30 min, and the supernatant was mixed with Ni-NTA agarose resin (Qiagen) for 1 h at 4 °C. Resin was washed with 20 mM Tris-HCl (pH 7.5) containing 300 mM NaCl, 0.2% Triton X-100, and either 0, 5, or 20 mM imidazole, and bound BepA<sub>His6</sub> was eluted with 20 mM Tris-HCl (pH 7.5) containing 300 mM NaCl and 250 mM imidazole. The cross-linked product containing BepA was visualized by staining with CBB after SDS/PAGE. An excised CBB-stained gel band was destained with 50% (vol/vol)

acetonitrile in 10 mM Tris-HCl (pH 8.0) and then dried in vacuo. The band was incubated with 0.01  $\mu$ g of trypsin, TPCK-treated (Worthington Biochemical Corporation) in 10 mM Tris-HCl (pH 8.0) at 37 °C for 12 h. An aliquot of the digest was analyzed by nano LC-MS/MS using an LCQ Deca XP instrument (Thermo Fisher Scientific). The peptides were separated using a nano ESI spray column (100  $\mu$ m i.d.  $\times$  375  $\mu$ m o.d.) packed with a reversed-phase material (Inertsil ODS-3, 3  $\mu$ m; GL Science) at a flow rate of 200 nL/min. The mass spectrometer was operated in the positive-ion mode, and the spectra were acquired in a data-dependent MS/MS mode. The MS/MS spectra were searched against the NCBI nr 20111107 database (15,916,306 sequences; 5,467,648,827 residues) using an in-house MASCOT server (version: 2.2.1; Matrix Science).

**Alkylation of LptD<sub>His6</sub>.** Cells of AD16 transformed with pMAN885EH derivatives encoding wild-type LptD<sub>His6</sub>, LptD(SSCC)<sub>His6</sub>, or LptD(CCSS)<sub>His6</sub> were grown overnight in L medium at 30 °C. They were harvested, resuspended in 100 mM Tris-HCl (pH 8.0), and incubated in the absence or presence of 100 mM DTT at room temperature for 30 min. Total cellular proteins were precipitated by trichloroacetic acid treatment and solubilized with 100 mM Tris-HCl (pH 8.0) containing 1% SDS by vortexing at room temperature for 30 min. Samples were incubated in the absence or presence of 10 mM EZ-Link Maleinide-PEG<sub>2</sub>-Biotin (Thermo Fisher Scientific) at 37 °C for 30 min. Proteins were separated by SDS/PAGE, and LptD<sub>His6</sub> was detected by immunoblotting with anti-His antibodies.

**Cell Fractionation.** Subcellular localization of LptD was determined as follows. Cells of AD16 and SN56 ( $\Delta$ bepA) were grown overnight in L medium at 30 °C. They were harvested, resuspended in 20 mM Tris-HCl (pH 7.5) containing 1 mM Pefabloc (Merck) and 100  $\mu$ g/mL lysozyme, and subjected to freezing and thawing. Then, 10  $\mu$ g/mL DNase I was added to the samples, and cells were disrupted by sonication. After removal of unbroken cells, membranes were recovered by centrifugation at 100,000  $\times$  g for 1 h at 4 °C and suspended in 20 mM Tris-HCl

(pH 7.5) containing 1 mM EDTA and 1 mM Pefabloc. The supernatant was saved as the soluble fraction. Total membranes thus obtained were layered on a 30–55% (wt/wt) stepwise sucrose gradient and centrifuged at 60,000  $\times$  g for 12 h at 4 °C. The sucrose gradient was fractionated into portions and analyzed by SDS/PAGE and immunoblotting.

**Growth of LptE-Deficient Strains.** Cells of GC187 and their derivatives were grown overnight in M9 medium supplemented with 19 amino acids other than methionine, 2  $\mu$ g/mL thiamine, 0.2% arabinose, and 0.2% glucose or maltose. Cells from 1-mL aliquot cultures were pelleted, washed three times with equal volumes of the same medium without arabinose, and inoculated into the same medium without arabinose to an initial OD<sub>600</sub> of  $\sim$ 0.001. Cells were subsequently grown at 30 °C to an early log phase.

**Other Techniques.** The minimum inhibitory concentrations (MICs) of antibiotics were determined by the agar dilution method using L agar. SDS/PAGE was carried out as described (5), unless otherwise specified. WIDE RANGE Gel Preparation buffer (Nacalai Tesque) was used in some experiments to improve separation of proteins. To raise anti-BepA antibodies, BepA<sub>His6</sub> was purified from SN150 carrying pTTQ-bepA-his<sub>6</sub> by metal affinity chromatography using TALON resin (Clontech) and used to immunize rabbits. A Penta-His HRP Conjugate Kit (Qiagen) or anti-His-tag polyclonal antibodies (MBL) were used to probe polyhistidine-tagged proteins. Anti-BamA, -BamB, -BamD, -LptD, and -LptE antisera were provided by Shin-ichi Matsuyama (Rikkyo University, Tokyo, Japan). Anti-BamC and -LamB antisera were provided by Thomas J. Silhavy (Princeton University, Princeton, NJ). Anti-OmpA antiserum was provided by Hajime Tokuda (University of Morioka, Iwate, Japan). Anti-MBP antiserum was purchased from MBL. Immunoblotting was carried out essentially as described previously (6), and proteins were visualized using enhanced chemiluminescence substrate (ECL or ECL Prime; GE Healthcare), followed by detection with a lumino-image analyzer (LAS-3000mini; Fujifilm).

1. Miller JH (1972) *Experiments in Molecular Genetics* (Cold Spring Harbor Lab Press, Cold Spring Harbor, NY).
2. Cherepanov PP, Wackernagel W (1995) Gene disruption in *Escherichia coli*: Tc<sup>R</sup> and Km<sup>R</sup> cassettes with the option of Fip-catalyzed excision of the antibiotic-resistance determinant. *Gene* 158(1):9–14.
3. Kitagawa M, et al. (2005) Complete set of ORF clones of *Escherichia coli* ASKA library (a complete set of *E. coli* K-12 ORF archive): Unique resources for biological research. *DNA Res* 12(5):291–299.
4. Baba T, et al. (2006) Construction of *Escherichia coli* K-12 in-frame, single-gene knockout mutants: The Keio collection. *Mol Syst Biol* 2:2006.0008.
5. Laemmli UK (1970) Cleavage of structural proteins during the assembly of the head of bacteriophage T4. *Nature* 227(5259):680–685.
6. Shimoike T, et al. (1995) Product of a new gene, *syd*, functionally interacts with SecY when overproduced in *Escherichia coli*. *J Biol Chem* 270(10):5519–5526.

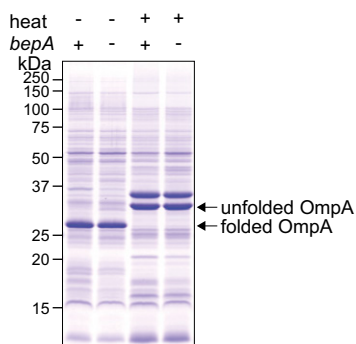

**Fig. S1.** Membrane protein profiles of the wild-type and  $\Delta$ bepA strains. Crude membranes prepared from overnight cultures of wild-type (+) or  $\Delta$ bepA cells (-) were solubilized in an SDS/PAGE sample buffer with (+) or without (-) heating at 99 °C for 5 min and were analyzed by the WIDE RANGE PAGE (10% acrylamide) followed by CBB staining.





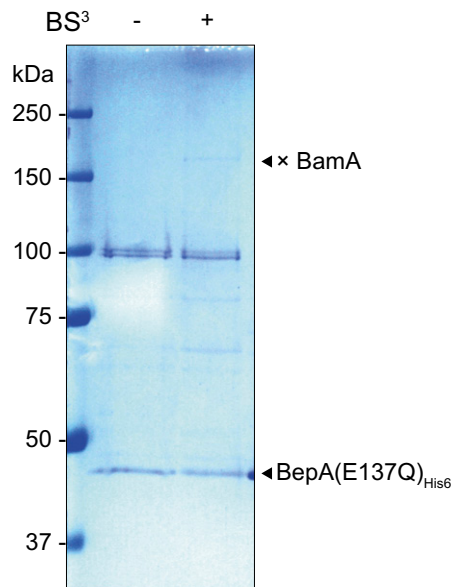

**Fig. S7.** Purification of the  $BS^3$ -mediated cross-linked product. Spheroplasts of wild-type cells transformed with a plasmid encoding C-terminally His<sub>6</sub>-tagged BepA with E137Q substitution were treated with  $BS^3$ . BepA(E137Q)<sub>His6</sub> and its cross-linked products were affinity purified as described in *Materials and Methods* and visualized by staining with CBB after SDS/PAGE. The cross-linked product (x BamA) that was subsequently identified as the BamA–BepA adduct by mass spectrometry is indicated.

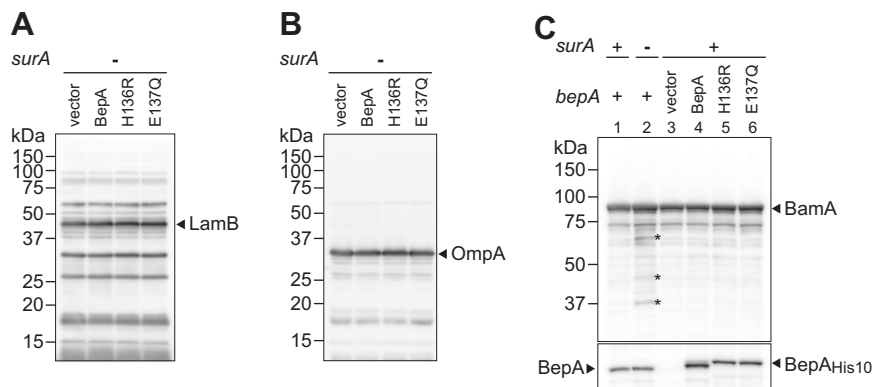

**Fig. S8.** Effect of the *surA* disruption or BepA overproduction on the OM protein profiles. (A and B) Effect on LamB and OmpA. Total cellular protein was prepared from  $\Delta surA/\Delta bepA$  cells harboring empty vector or either of the plasmids encoding C-terminally His<sub>10</sub>-tagged wild-type BepA or its H136R or E137Q derivative and was subjected to SDS/PAGE followed by immunoblotting with anti-LamB (A) or anti-OmpA (B) antisera. (C) Effect on BamA. Overexpression of BepA does not cause the degradation of BamA in the *surA*<sup>+</sup> cells. Total cellular proteins were prepared from wild-type (lanes 1 and 3–6) or the  $\Delta surA$  cells (lane 2) without plasmid (lanes 1 and 2) or with either empty vector or a plasmid encoding C-terminally His<sub>10</sub>-tagged wild-type BepA or its H136R or E137Q derivative (lanes 3–6) and was subjected to SDS/PAGE followed by immunoblotting with anti-BamA or anti-BepA antisera. Putative BepA degradation products of BamA are indicated by asterisks.

**Table S1. List of ASKA plasmids that suppressed erythromycin sensitivity of the  $\Delta bepA \Delta bamE$  strain**

| Plasmid*                   | Gene product                                                | Growth on SDS <sup>†</sup> | MIC, $\mu\text{g}/\text{mL}$ |        |            |        |
|----------------------------|-------------------------------------------------------------|----------------------------|------------------------------|--------|------------|--------|
|                            |                                                             |                            | Erythromycin                 |        | Vancomycin |        |
|                            |                                                             |                            | -IPTG                        | + IPTG | - IPTG     | + IPTG |
| pTH-bepA-his <sub>10</sub> | BepA                                                        | +                          | 12.5                         | 25     | 50         | 100    |
| pCA24N $\Delta$ Not        | Empty vector                                                | —                          | 6.25                         | 3.13   | 25         | 25     |
| <i>fhuF</i>                | Ferric iron reductase                                       | +                          | 25                           | 12.5   | 25         | 50     |
| <i>mppA</i>                | Murein tripeptide transporter                               | +                          | 6.25                         | 12.5   | 25         | 50     |
| <i>stfQ</i>                | Predicted side tail fiber assembly protein                  | +                          | 6.25                         | 12.5   | 25         | 50     |
| <i>yaiU</i>                | Conserved protein                                           | +                          | 6.25                         | 12.5   | 25         | 50     |
| <i>ydfW</i>                | Pseudogene, integrase fragment, Qin prophage                | +                          | 25                           | 25     | 25         | 50     |
| <i>yeaH</i>                | Conserved protein                                           | +                          | 6.25                         | 12.5   | 25         | 25     |
| <i>ychP</i>                | Predicted invasin                                           | +                          | 6.25                         | 12.5   | 25         | 50     |
| <i>yneO</i>                | AidA homolog, autotransporter                               | +                          | 6.25                         | 12.5   | 25         | 25     |
| <i>ynjE</i>                | Predicted thiosulfate sulfur transferase                    | +                          | 6.25                         | 12.5   | 25         | 50     |
| <i>appY</i>                | Global transcription regulator                              | +                          | 6.25                         | 12.5   | 25         | 25     |
| <i>gadW</i>                | Transcriptional activator of <i>gadA</i> and <i>gadBC</i>   | +                          | 6.25                         | 12.5   | 25         | 50     |
| <i>soxS</i>                | DNA-binding transcriptional dual regulator                  | +                          | 6.25                         | 12.5   | 25         | 25     |
| <i>ydeO</i>                | Transcriptional activator for <i>mdtEF</i>                  | +                          | 6.25                         | 25     | 25         | 50     |
| <i>rluE</i>                | 23S rRNA U2457 pseudouridine synthase                       | +                          | 6.25                         | 12.5   | 25         | 25     |
| <i>lptE</i>                | LPS assembly OM complex                                     | ±                          | 12.5                         | 12.5   | 50         | 50     |
| <i>pagP</i>                | Palmitoyl transferase for Lipid A                           | ±                          | 6.25                         | 12.5   | 25         | 50     |
| <i>ybil</i>                | DksA-type zinc finger protein                               | ±                          | 6.25                         | 6.25   | 25         | 25     |
| <i>bcsC</i>                | Cellulose synthase subunit                                  | ±                          | 6.25                         | 12.5   | 25         | 25     |
| <i>rrmJ</i>                | 23S rRNA U2552 ribose 2'-O-methyltransferase                | ±                          | 6.25                         | 12.5   | 12.5       | 25     |
| <i>rplO</i>                | 50S ribosomal subunit protein L15                           | —                          | 6.25                         | 6.25   | 25         | 25     |
| <i>rpsM</i>                | 30S ribosomal subunit protein S13                           | —                          | 6.25                         | 6.25   | 25         | 25     |
| <i>ykgO</i>                | Predicted ribosomal protein                                 | —                          | 6.25                         | 6.25   | 25         | 25     |
| <i>marA</i>                | Transcriptional activator of multiple antibiotic resistance | —                          | 6.25                         | 6.25   | 12.5       | 6.25   |
| <i>yaiT</i>                | Conserved protein                                           | —                          | 6.25                         | 12.5   | 25         | 50     |
| <i>yhfG</i>                | Predicted protein                                           | —                          | 6.25                         | 6.25   | 12.5       | 25     |

+, normal growth; ±, weak growth; —, no growth.

\*Cloned genes in ASKA plasmids are shown.

<sup>†</sup>Growth phenotype on L agar containing 0.5% SDS is shown.

**Table S2. Strains used in this study**

| <i>E. coli</i> strains | Genotype                                                                                                                                                                                                                                     | Source               |
|------------------------|----------------------------------------------------------------------------------------------------------------------------------------------------------------------------------------------------------------------------------------------|----------------------|
| AD16                   | $\Delta pro-lac\ thi$ [ $F'$ $lac^q$ ZM15 $Y^+$ $pro^+$ ]                                                                                                                                                                                    | 1                    |
| SN56                   | AD16 $\Delta bepA$                                                                                                                                                                                                                           | This study           |
| SN147                  | AD16 $\Delta bamB::tet$                                                                                                                                                                                                                      | This study           |
| SN150                  | AD16 $\Delta bamB::tet\ \Delta bepA$                                                                                                                                                                                                         | This study           |
| SN305                  | AD16 $\Delta surA::kan$                                                                                                                                                                                                                      | This study           |
| SN259                  | AD16 $\Delta surA::kan\ \Delta bepA$                                                                                                                                                                                                         | This study           |
| SN531                  | AD16 $\Delta bamC::kan$                                                                                                                                                                                                                      | This study           |
| SN533                  | AD16 $\Delta bamC::kan\ \Delta bepA$                                                                                                                                                                                                         | This study           |
| SN535                  | AD16 $\Delta bamE::kan$                                                                                                                                                                                                                      | This study           |
| SN537                  | AD16 $\Delta bamE::kan\ \Delta bepA$                                                                                                                                                                                                         | This study           |
| SN547                  | AD16 $\Delta dsbA::kan$                                                                                                                                                                                                                      | This study           |
| SN548                  | AD16 $\Delta dsbA::kan\ \Delta bepA$                                                                                                                                                                                                         | This study           |
| SN807                  | AD16 $\Delta dsbC$                                                                                                                                                                                                                           | This study           |
| SN773                  | AD16 $\Delta dsbC\ \Delta bepA$                                                                                                                                                                                                              | This study           |
| SN834                  | AD16 $\Delta dsbC\ \Delta dsbG$                                                                                                                                                                                                              | This study           |
| SN835                  | AD16 $\Delta dsbC\ \Delta dsbG\ \Delta bepA$                                                                                                                                                                                                 | This study           |
| SN836                  | AD16 $\Delta dsbA::kan\ \Delta dsbC\ \Delta dsbG$                                                                                                                                                                                            | This study           |
| SN838                  | AD16 $\Delta dsbA::kan\ \Delta dsbC\ \Delta dsbG\ \Delta bepA$                                                                                                                                                                               | This study           |
| MC4100                 | <i>araD139</i> $\Delta(argF-lac)U169$ <i>rpsL150</i> <i>relA1</i> <i>flbB5301</i> <i>deoC1</i> <i>ptsF25</i> <i>rbsR</i>                                                                                                                     | 2                    |
| SN896                  | MC4100 $\Delta bepA$                                                                                                                                                                                                                         | This study           |
| SN909                  | MC4100 $\Delta bamB::tet\ \Delta bepA$                                                                                                                                                                                                       | This study           |
| SN910                  | MC4100 $\Delta bamC::kan\ \Delta bepA$                                                                                                                                                                                                       | This study           |
| SN911                  | MC4100 $\Delta bamE::kan\ \Delta bepA$                                                                                                                                                                                                       | This study           |
| AM604                  | MC4100 <i>ara</i> <sup>+</sup>                                                                                                                                                                                                               | 3                    |
| GC187                  | AM604 $\Delta jptE2::kan\ \Delta(\lambda_{att-lom})::bla-P_{ara}jptE(atg)-araC$                                                                                                                                                              | Gift from T. Silhavy |
| SN1145                 | GC187 Km <sup>S</sup>                                                                                                                                                                                                                        | This study           |
| SN1159                 | SN1145 $\Delta bepA::kan$                                                                                                                                                                                                                    | This study           |
| SN1194                 | SN1145 $\Delta bepA$                                                                                                                                                                                                                         | This study           |
| KRX                    | $\Delta pro-lac\ thi$ [ $F'$ <i>traD36</i> $\Delta ompP$ $lac^q$ ZM15 $pro^+$ ] $\Delta ompT$ <i>endA1</i> <i>recA1</i><br><i>gyrA96</i> <i>hsdR17</i> <i>e14</i> <sup>-</sup> <i>relA1</i> <i>supE44</i> $\Delta rhaBAD::T7$ RNA polymerase | Promega              |

1. Kihara A, Akiyama Y, Ito K (1996) A protease complex in the *Escherichia coli* plasma membrane: HflKC (HflA) forms a complex with FtsH (HflB), regulating its proteolytic activity against SecY. *EMBO J* 15(22):6122–6131.
2. Casadaban MJ (1976) Transposition and fusion of the *lac* genes to selected promoters in *Escherichia coli* using bacteriophage lambda and Mu. *J Mol Biol* 104(3):541–555.
3. Wu T, et al. (2006) Identification of a protein complex that assembles lipopolysaccharide in the outer membrane of *Escherichia coli*. *Proc Natl Acad Sci USA* 103(31):11754–11759.





**Table S4. Primers used in this study**

| Name               | Sequence* (5'–3')                                           |
|--------------------|-------------------------------------------------------------|
| yfgC-1             | GATGAATTCAGAAATACAGGATAGAG                                  |
| yfgC-2             | GGGGTACCTAATGATGATGATGATGATGATGCTCGAGCATCTTGGTATAAGGCTTAAAG |
| yfgC-3             | ATGAATTCAGGCAGTTGAAAAAAACC                                  |
| yfgC-4             | CATGCCATGGTCAGGCAGTTGAAAAAAACCTGG                           |
| M13 Primer M4      | GTTTTCCAGTCACGAC                                            |
| yfgC-his10-1       | CATCATCATCATTAAGTACCCG                                      |
| yfgC-his10-2       | ATGATGATGATGATGATGCTCG                                      |
| yfgC_PstI-2        | TTACATCTTGGTATAAGGCTTAAAGCGTTCCTGCA                         |
| yfgC_H136R         | CTGGCTTCAGTTATGGCGCGGAAATCTCCACGTCACC                       |
| yfgC_H136R-r       | GGTGACGTGGGAGATTTTCGCGCGCCATAACTGAAGCCAG                    |
| yfgC_E137X         | GGCTTCAGTTATGGCGCACYAGATCTCCACGTCACCCAAACG                  |
| yfgC_E137X-r       | CGTTGGGTGACGTGGGAGATCTRGTGCGCCATAACTGAAGCC                  |
| TPR4-2             | GCTAAATAACCGCGATTAGGAGCTGGCTGCGCG                           |
| TPR4-2-r           | CGCGCAGCCAGCTCCTAATCGCGGTTATTTAGC                           |
| lptE-1             | GATGAATTCGGTCGTTGGCTAAGCGC                                  |
| lptE-2             | CAATTCAGCTTCATTGAGCTGCGCGCGG                                |
| lptD-1             | AACGTTACCGATGATGGAAC                                        |
| lptD-2             | CAATTCCTAGATTAGTGATGGTGATGGTGATGCTCCAAAGTGTTCGATACGGCAG     |
| lptD_C315          | GCCGACCTCGCCTCACAGTCAATGTTGGGCGTGCCAAGC                     |
| lptD_C315-r        | GCTTGGCACGCCCCAACATTGACTGTGAGGCGAGGTCGGC                    |
| lptD_C1735         | CGGTAGCTTTACCTCCTCACTGCCGGTTCTGACACCTG                      |
| lptD_C1735-r       | CAGGTGTCAGAACCCGGCAGTGAGGAGTAAAGCTACCG                      |
| lptD_C7245         | GCAATACAGCTCCTCATGCTATGCAATTCGC                             |
| lptD_C7245-r       | GCGAATTGCATAGCATGAGGAGCTGTATTGC                             |
| lptD_C7255         | GTGCAATACAGCTCCTGCTCATATGCAATTCGCGTCGGTTAC                  |
| lptD_C7255-r       | GTAACCGACGCGAATTGCATATGAGCAGGAGCTGTATTGCAC                  |
| lptD_C7245/C7255   | GTGCAATACAGCTCCTCATATGCAATTCGCGTCGGTTAC                     |
| lptD_C7245/C7255-r | GTAACCGACGCGAATTGCATATGATGAGGAGCTGTATTGCAC                  |
| yfgL-1             | GATGAATTCGGAGGTTAAATTTATGCAATTCGCTAAATTAAGTGC               |
| yfgL-2             | CAATTCAGCTTAGTGATGGTGATGGTGATGCTCCAGACGTGTAATAGAGTACACGGTTC |

\*The following IUB codes are used to indicate base mixtures: Y= C + T; R = A + G.
